# Supplementary material
Source: PubMed Central journal article supplement (PMC3864293)
Supplement: 1317588110_sapp.pdf [file 1317588110_sapp.pdf]

# Supporting Information for “Limitations of inclusive fitness” Calculation of the regression method

Benjamin Allen, Martin A. Nowak, Edward O. Wilson

August 12, 2013

In this Supplementary Information we provide a step-by-step calculation of the values of  $B$ ,  $C$ , and  $R$  for the example in Figure 1 of the main text, in order to clearly illustrate the regression method. The given values for this example are shown in Table 1.

## Calculating $B$ and $C$

To perform the regression method, we fit the given values to a linear model of the form

$$w_i = W_0 - Cg_i + Bg'_i + \epsilon_i,$$

Table 1: Values for regression

| Fitness $w$ | Own genotype $g$ | Partner's genotype $g'$ |
|-------------|------------------|-------------------------|
| 4           | 1                | 1                       |
| 0           | 1                | 1                       |
| 0           | 1                | 0                       |
| 2           | 0                | 1                       |
| 0           | 0                | 0                       |
| 0           | 0                | 0                       |
| 2           | 0                | 0                       |

by finding values of  $W_0$ ,  $C$  and  $B$  that minimize the sum of squares  $E = \sum_{i=1}^N \epsilon_i^2$ . This quantity is minimized when the partial derivatives  $\frac{\partial E}{\partial W_0}$ ,  $\frac{\partial E}{\partial C}$ , and  $\frac{\partial E}{\partial B}$  all vanish. In the case of  $W_0$  this yields the equation

$$\begin{aligned}
0 &= \frac{\partial E}{\partial W_0} \\
&= 2 \sum_{i=1}^N \epsilon_i \frac{\partial \epsilon_i}{\partial W_0} \\
&= 2 \sum_{i=1}^N (w_i - W_0 + Cg_i - Bg'_i) (-1) \\
&= -2(8 - 8W_0 + 3C - 3B).
\end{aligned}$$

For  $C$  we obtain

$$\begin{aligned}
0 &= \frac{\partial E}{\partial C} \\
&= 2 \sum_{i=1}^N \epsilon_i \frac{\partial \epsilon_i}{\partial C} \\
&= 2 \sum_{i=1}^N (w_i - W_0 + Cg_i - Bg'_i) g_i \\
&= 2(4 - 3W_0 + 3C - 2B).
\end{aligned}$$

For  $B$  we obtain

$$\begin{aligned}
0 &= \frac{\partial E}{\partial B} \\
&= 2 \sum_{i=1}^N \epsilon_i \frac{\partial \epsilon_i}{\partial B} \\
&= 2 \sum_{i=1}^N (w_i - W_0 + Cg_i - Bg'_i) (-g'_i) \\
&= -2(6 - 3W_0 + 2C - 3B).
\end{aligned}$$

Combining the above results, we arrive at the system of equations

$$\begin{aligned}
8W_0 - 3C + 3B &= 8 \\
3W_0 - 3C + 2B &= 4 \\
3W_0 - 2C + 3B &= 6,
\end{aligned}$$

the solution to which is  $W_0 = 5/11$ ,  $C = 3/11$ ,  $B = 19/11$ .

## Calculating $R$

$R$  can be calculated directly as

$$R = \frac{\frac{1}{N} \sum_{i=1}^N g_i g'_i - \left( \frac{1}{N} \sum_{i=1}^N g_i \right) \left( \frac{1}{N} \sum_{i=1}^N g'_i \right)}{\frac{1}{N} \sum_{i=1}^N g_i^2 - \left( \frac{1}{N} \sum_{i=1}^N g_i \right)^2} = \frac{7}{15}.$$
